# Supplementary material for: The Human Cell Surfaceome of Breast Tumors
Source: Hindawi journal article supplement (doi:10.1155/2013/976816), 2013-01-01
Supplement: f1 [file 976816.f1.pdf]

TABLE S1.

Surfaceome genes that contain Mutations, Amplifications and Homozygotic Deletions (HD) in breast tumors

| Gene      | Mutation <sup>1</sup> | Amplification <sup>2</sup> | HD <sup>2</sup> |
|-----------|-----------------------|----------------------------|-----------------|
| ABCA12    | Y                     | -                          | -               |
| ABCA3     | Y                     | -                          | -               |
| ABCA4     | Y                     | -                          | -               |
| ABCC8     | -                     | Y                          | -               |
| ADAM18    | -                     | Y                          | -               |
| ADAM2     | -                     | Y                          | -               |
| ADAM32    | -                     | Y                          | -               |
| ADAM9     | -                     | Y                          | -               |
| ADRA1A    | Y                     | -                          | -               |
| ADRB3     | -                     | Y                          | -               |
| ALCAM     | Y                     | -                          | -               |
| ALKBH5    | -                     | Y                          | -               |
| AMFR      | Y                     | -                          | -               |
| AMIGO1    | Y                     | -                          | -               |
| ANO1      | -                     | Y                          | -               |
| APOL1     | Y                     | -                          | -               |
| AQP8      | Y                     | -                          | -               |
| ASGR1     | Y                     | -                          | -               |
| ASTN2     | Y                     | -                          | -               |
| ATCAY     | Y                     | -                          | -               |
| ATG9A     | Y                     | -                          | -               |
| ATP12A    | Y                     | -                          | -               |
| ATP2A3    | Y                     | -                          | -               |
| ATP2C2    | Y                     | -                          | -               |
| ATP6V0B   | Y                     | -                          | -               |
| ATP8B1    | Y                     | -                          | -               |
| ATP8B4    | Y                     | -                          | -               |
| AVPR2     | Y                     | -                          | -               |
| BAI1      | Y                     | -                          | -               |
| BEST3     | -                     | Y                          | -               |
| BOC       | Y                     | -                          | -               |
| BVES      | -                     | -                          | Y               |
| C10orf54  | Y                     | -                          | -               |
| C14orf100 | Y                     | -                          | -               |
| C14orf101 | Y                     | -                          | -               |
| C14orf180 | -                     | Y                          | -               |

|          |   |   |   |
|----------|---|---|---|
| C16orf58 | Y | - | - |
| C18orf19 | Y | - | - |
| C19orf12 | - | Y | - |
| C19orf28 | Y | - | - |
| C1orf2   | Y | - | - |
| C1orf32  | - | Y | - |
| C6orf174 | Y | - | - |
| C9orf11  | - | - | Y |
| CACNA1B  | Y | - | - |
| CACNA1F  | Y | - | - |
| CACNA1G  | Y | - | - |
| CACNA1H  | Y | Y | - |
| CACNA1I  | Y | - | - |
| CATSPERB | Y | - | - |
| CCDC136  | Y | - | - |
| CCR7     | - | Y | - |
| CD2      | Y | - | - |
| CD74     | Y | - | - |
| CD97     | Y | - | - |
| CDH10    | Y | - | - |
| CDH20    | Y | - | - |
| CDH26    | - | Y | - |
| CDH3     | - | - | Y |
| CDH8     | Y | - | - |
| CDIPT    | Y | - | - |
| CDON     | Y | - | - |
| CHRND    | Y | - | - |
| CLCA2    | Y | - | - |
| CLCN1    | Y | - | - |
| CLCN2    | Y | - | - |
| CLCN7    | - | Y | - |
| CLDN14   | - | Y | - |
| CLPTM1L  | Y | - | - |
| CMTM5    | - | Y | - |
| CNGA3    | - | Y | - |
| CNNM4    | Y | - | - |
| CSF1R    | Y | - | - |
| CXADR    | - | Y | - |
| CXCR5    | Y | - | - |
| CYHR1    | - | Y | - |
| DC2      | Y | - | - |
| DLK2     | - | Y | - |
| DPY19L3  | - | Y | - |
| DUOX1    | Y | - | - |

|          |   |   |   |
|----------|---|---|---|
| DYSF     | Y | - | - |
| EDNRA    | Y | - | - |
| ELOVL5   | - | Y | - |
| EMR2     | - | Y | - |
| ENTPD7   | Y | - | - |
| EPHA8    | Y | - | - |
| EPHB3    | Y | - | - |
| ERBB2    | - | Y | - |
| ERBB4    | Y | - | - |
| EREG     | Y | - | - |
| EVI2A    | Y | - | - |
| EVI2B    | Y | - | - |
| F2RL3    | - | Y | - |
| FAM134B  | Y | - | - |
| FAM171A1 | Y | - | - |
| FANCM    | Y | - | - |
| FAR1     | - | Y | - |
| FAT      | - | - | Y |
| FCRL3    | Y | - | - |
| FCRL5    | Y | - | - |
| FER1L3   | Y | - | - |
| FGFR1    | Y | Y | - |
| FGFR2    | Y | - | - |
| FLJ46321 | Y | - | - |
| FNDC3B   | Y | - | - |
| GABRA4   | Y | - | - |
| GABRP    | Y | - | - |
| GFRAL    | Y | - | - |
| GJA8     | Y | - | - |
| GJB1     | Y | - | - |
| GJD3     | - | Y | - |
| GP5      | Y | - | - |
| GPAA1    | - | Y | - |
| GPNMB    | Y | - | - |
| GPR111   | Y | - | - |
| GPR115   | Y | - | - |
| GPR124   | - | Y | - |
| GPR172A  | - | Y | - |
| GPR180   | Y | - | - |
| GPR45    | Y | - | - |
| GPR83    | - | Y | - |
| GRAMD4   | Y | - | - |
| GRIK2    | Y | - | - |
| GRIK3    | Y | - | - |

|          |   |   |   |
|----------|---|---|---|
| GRIN2C   | Y | - | - |
| GRIN2D   | Y | - | - |
| GRINA    | - | Y | - |
| GRM6     | Y | - | - |
| GUCY2F   | Y | - | - |
| HAS2     | - | Y | - |
| HEPACAM2 | Y | - | - |
| HLA-A    | - | Y | - |
| HM13     | Y | - | - |
| HRH3     | - | Y | - |
| HTR2A    | - | Y | - |
| ICAM5    | Y | - | - |
| IL13RA1  | - | Y | - |
| IL1RAPL2 | Y | - | - |
| IL7R     | Y | - | - |
| INPP4A   | - | Y | - |
| ITGA9    | Y | - | - |
| ITGAE    | Y | - | - |
| ITGAL    | Y | - | - |
| ITPR1    | Y | - | - |
| KCNA5    | Y | - | - |
| KCNC2    | Y | - | - |
| KCNG1    | - | Y | - |
| KCNJ1    | Y | - | - |
| KCNJ11   | - | Y | - |
| KCNJ15   | Y | - | - |
| KCNMB4   | - | Y | - |
| KCNT2    | Y | - | - |
| KIAA1161 | Y | Y | - |
| KIAA1324 | Y | - | - |
| KIR2DL1  | Y | - | - |
| KIR3DL1  | Y | - | - |
| LHCGR    | Y | - | - |
| LINGO2   | - | - | Y |
| LMF2     | Y | - | - |
| LRBA     | Y | - | - |
| LRRC19   | - | - | Y |
| LRRC24   | - | Y | - |
| LY6G6F   | Y | - | - |
| MAGEH1   | - | Y | - |
| MAMDC4   | Y | - | - |
| MBTPS2   | Y | - | - |
| MCAM     | Y | - | - |
| MCOLN1   | Y | - | - |

|          |   |   |   |
|----------|---|---|---|
| MFSD3    | - | Y | - |
| MFSD9    | Y | - | - |
| MGC35440 | - | Y | - |
| MMP15    | Y | - | - |
| MOSPD1   | Y | Y | - |
| MPDU1    | Y | - | - |
| MRGPRD   | - | Y | - |
| MRGPRF   | - | Y | - |
| MTNR1A   | - | - | Y |
| NALCN    | Y | - | - |
| NCR2     | - | Y | - |
| NFASC    | Y | - | - |
| NKAIN4   | - | Y | - |
| NOX5     | Y | - | - |
| NPBWR1   | Y | - | - |
| NRCAM    | Y | - | - |
| NRM      | Y | - | - |
| NTRK3    | Y | - | - |
| OCA2     | Y | - | - |
| ODZ1     | Y | - | - |
| OPRS1    | - | Y | - |
| OR10A2   | Y | - | - |
| OR10H4   | Y | - | - |
| OR10Q1   | - | Y | - |
| OR10W1   | - | Y | - |
| OR12D3   | Y | - | - |
| OR1I1    | - | Y | - |
| OR1J2    | Y | - | - |
| OR1N1    | Y | - | - |
| OR1S1    | Y | Y | - |
| OR1S2    | - | Y | - |
| OR2M4    | Y | - | - |
| OR2W3    | Y | - | - |
| OR2W5    | Y | - | - |
| OR4C6    | - | - | Y |
| OR4D2    | Y | - | - |
| OR4S2    | - | - | Y |
| OR52A1   | Y | - | - |
| OR52H1   | Y | - | - |
| OR56A1   | Y | - | - |
| OR5B12   | - | Y | - |
| OR5B17   | - | Y | - |
| OR5B2    | - | Y | - |
| OR5B21   | - | Y | - |

|          |   |   |   |
|----------|---|---|---|
| OR5B3    | - | Y | - |
| OR5H1    | Y | - | - |
| OR5J2    | Y | - | - |
| OR5M11   | Y | - | - |
| OR6Q1    | - | Y | - |
| OR7A10   | - | Y | - |
| OR7A17   | - | Y | - |
| OR7A5    | - | Y | - |
| OR7C1    | - | Y | - |
| OR7C2    | - | Y | - |
| OR8B12   | Y | - | - |
| OR8D2    | Y | - | - |
| OR8I2    | Y | - | - |
| OR9I1    | - | Y | - |
| OR9Q1    | - | Y | - |
| OR9Q2    | Y | Y | - |
| ORMDL3   | - | Y | - |
| OTOF     | Y | - | - |
| PANX2    | Y | - | - |
| PCDH19   | Y | - | - |
| PCDH20   | Y | - | - |
| PCDH7    | - | Y | - |
| PCDH8    | Y | - | Y |
| PCDHA10  | Y | - | - |
| PCDHA11  | Y | - | - |
| PCDHB15  | Y | - | - |
| PCDHGA1  | Y | - | - |
| PCDHGA3  | Y | - | - |
| PCDHGA6  | Y | - | - |
| PCDHGB1  | Y | - | - |
| PCDHGB5  | Y | - | - |
| PDGFRB   | Y | - | - |
| PERLD1   | - | Y | - |
| PIGN     | Y | - | - |
| PKD1L1   | Y | - | - |
| PKD1L2   | Y | - | - |
| PKDREJ   | Y | - | - |
| PLB1     | Y | - | - |
| PLXDC1   | - | Y | - |
| PMEPA1   | - | Y | - |
| PODXL    | Y | - | - |
| POPDC3   | - | - | Y |
| PPAPDC1A | Y | - | - |
| PPAPDC1B | - | Y | - |

|          |   |   |   |
|----------|---|---|---|
| PPAPDC3  | Y | - | - |
| PPP1R3A  | Y | - | - |
| PRPH2    | - | Y | - |
| PRRG1    | Y | - | - |
| PRRT1    | Y | - | - |
| PTCHD3   | - | - | Y |
| PTK7     | - | Y | - |
| PTPLAD2  | - | - | Y |
| PTPN1    | - | Y | - |
| PTPRC    | Y | - | - |
| PTPRR    | - | Y | - |
| RCE1     | Y | - | - |
| RGS9BP   | - | Y | - |
| RHD      | Y | - | - |
| RNF149   | Y | - | - |
| ROBO2    | - | - | Y |
| ROR1     | Y | - | - |
| RTP1     | Y | - | - |
| RYR1     | Y | - | - |
| S100A10  | - | Y | - |
| SCN3A    | Y | - | - |
| SCNN1B   | Y | - | - |
| SEMA4G   | Y | - | - |
| SEMA5B   | Y | - | - |
| SEMA6D   | Y | - | - |
| SFXN3    | Y | - | - |
| SGPP1    | - | - | Y |
| SLAMF1   | Y | - | - |
| SLAMF8   | - | Y | - |
| SLC13A2  | - | Y | - |
| SLC17A6  | Y | - | - |
| SLC1A6   | - | Y | - |
| SLC22A7  | - | Y | - |
| SLC22A9  | Y | - | - |
| SLC25A4  | - | Y | - |
| SLC38A3  | Y | - | - |
| SLC39A12 | Y | - | - |
| SLC39A4  | - | Y | - |
| SLC46A1  | - | Y | - |
| SLC5A2   | Y | - | - |
| SLC6A3   | Y | - | - |
| SLC6A5   | Y | - | - |
| SLC7A7   | Y | - | - |
| SLC8A3   | Y | - | - |

|          |   |   |   |
|----------|---|---|---|
| SLC9A10  | Y | - | - |
| SLC9A2   | Y | - | - |
| SLCO2B1  | Y | - | - |
| SLITRK1  | - | - | Y |
| SORL1    | Y | - | - |
| STAB1    | Y | - | - |
| STARD3   | - | Y | - |
| SUCNR1   | - | Y | - |
| SUSD3    | Y | - | - |
| SYNGR3   | - | Y | - |
| SYT3     | Y | - | - |
| TAS2R13  | Y | - | - |
| TEK      | Y | - | Y |
| TFRC     | - | Y | - |
| TLCD1    | - | Y | - |
| TLR3     | - | - | Y |
| TM2D2    | - | Y | - |
| TM4SF19  | Y | - | - |
| TMED1    | Y | - | - |
| TMEM123  | Y | - | - |
| TMEM125  | Y | - | - |
| TMEM132B | Y | - | - |
| TMEM14A  | - | Y | - |
| TMEM14B  | Y | - | - |
| TMEM161A | Y | - | - |
| TMEM179  | - | Y | - |
| TMEM199  | - | Y | - |
| TMEM206  | Y | - | - |
| TMEM32   | - | Y | - |
| TMEM37   | Y | - | - |
| TMEM39A  | Y | - | - |
| TMEM62   | Y | - | - |
| TMEM63A  | Y | - | - |
| TMEM82   | Y | - | - |
| TMPRSS6  | Y | - | - |
| TMTC4    | Y | - | - |
| TNFRSF25 | Y | - | - |
| TPCN2    | - | Y | - |
| TPSG1    | - | Y | - |
| TPTE     | Y | - | - |
| TREM1    | Y | Y | - |
| TREM2    | - | Y | - |
| TREML1   | Y | Y | - |
| TREML2   | - | Y | - |



|         |   |   |   |
|---------|---|---|---|
| TRPA1   | - | Y | - |
| TRPC4   | Y | - | - |
| TRPM7   | Y | - | - |
| TSPAN2  | - | Y | - |
| TSPAN4  | Y | - | - |
| TXNDC15 | Y | - | - |
| UNC50   | - | Y | - |
| UTS2R   | Y | - | - |
| VSIG8   | - | Y | - |
| WBSCR28 | Y | - | - |
| XKR7    | Y | - | - |
| YIPF3   | - | Y | - |
| YIPF6   | - | Y | - |
| ZDHHC4  | Y | - | - |
| ZDHHC5  | - | Y | - |

1 - Wood et al (2008)

2- Leary et al (2008)
